# Supplementary material
Source: publisher site journal article supplement (https://www.dovepress.com/article/492124)
Supplement: Supplementary file 1 [file get_supplementary_file.php]

**Appendix Table 1. Characteristics and Selected Medications of the COPDGene Study Cohort Population by Incident Diabetes Status, Stratified by Race, mean (std) or % (n).**

| **Characteristics** | **African Americans** | | **Non-Hispanic White Americans** | |
| --- | --- | --- | --- | --- |
|  | **Incident diabetes**  **(n=147)** | **No diabetes**  **(n=1,148)** | **Incident diabetes**  **(n=201)** | **No diabetes**  **(n=3,197)** |
| **Age, years** | 55.5 (5.4) | 54.2 (7.1) | 61.4 (7.7) | 62.0 (8.5) |
| **Sex, female** | 57.8 (85) | 48.3 (554)a | 47.3 (95) | 51.2 (1,637) |
| **BMI, kg/m2** | 32.2 (6.9) | 28.4 (6.3)d | 33.5 (7.0) | 28.2 (5.4)d |
| **Hypercholesterolemia** | 25.2 (37) | 21.6 (248) | 56.2 (113) | 42.7 (1,366)c |
| **Hypertension** | 48.3 (71) | 40.2 (461) | 54.7 (110) | 35.8 (1,143)d |
| **Coronary artery disease** | 1.4 (2) | 1.7 (19) | 11.0 (22) | 7.0 (225)a |
| **Smoking pack years*** | 36.4 (20.3) | 37.5 (20.8) | 49.0 (24.0) | 43.5 (23.6)b |
| ***Characteristics at follow-up*** |  |  |  |  |
| **Hemoglobin, g/dL** | 13.7 (1.5) | 13.6 (1.5) | 14.1 (1.5) | 14.4 (1.4) |
| **Red blood cells** | 4.7 (0.59) | 4.6 (0.53)a | 4.6 (0.47) | 4.6 (0.46) |
| **White blood cells** | 7.4 (2.7) | 6.4 (2.1)d | 8.2 (2.9) | 7.3 (2.2)d |
| **Natural log Ferritin, RFU** | 8.8 (8.6) | 8.7 (8.7) | 8.6 (0.81) | 8.5 (0.80) |
| **Natural log Transferrin, RFU** | 12.1 (0.11) | 12.1 (0.11) | 12.1 (0.10) | 12.1 (0.10)d |
| **Natural log Hepcidin, RFU** | 7.4 (0.84) | 7.4 (0.87) | 7.6 (0.86) | 7.5 (0.89) |
| **CRP, RFU** | 10.2 (0.80) | 9.9 (0.97)c | 10.1 (0.74) | 9.8 (0.79)d |
| **IL-6*, RFU** | 6.3 (0.49) | 6.5 (0.56) | 6.2 (0.51) | 6.1 (0.53)b |
| **Medication, class** |  |  |  |  |
| **Statins** | 39.0 (55) | 16.5 (175)d | 63.3 (124) | 38.0 (1,185)d |
| **Anti-platelets** | 27.0 (38) | 14.8 (157)c | 36.2 (71) | 22.4 (697)d |
| **Proton pump**  **inhibitors** | 30.0 (31) | 12.2 (129)b | 25.0 (49) | 20.4 (637) |
| **Diuretics** | 25.5 (36) | 19.8 (210) | 29.6 (58) | 16.9 (528)d |
| **Beta-blockers** |  |  |  |  |
| **ACE**  **inhibitors/sartans** | 47.6 (70) | 19.3 (222)d | 45.8 (92) | 24.8 (792)d |

ap < 0.05 bp < 0.01 cp < 0.001 dp < 0.0001

*Natural logarithmically transformed before analysis

**Appendix Table 2. Association of Ferritin and Transferrin at P2 with Incident Diabetes at P2**

|  | **OR (95% CI)** |
| --- | --- |
| **Ferritin** |  |
| **Q2** | 1.18 (0.76-1.84) |
| **Q3** | 1.12 (0.70-1.80) |
| **Q4** | 1.01 (0.61-1.70) |
| **Q5** | 1.71 (1.00-2.90) |
| **Transferrin** |  |
| **Q2** | 1.16 (0.83-1.61) |
| **Q3** | 0.90 (0.63-1.28) |
| **Q4** | 0.98 (0.69-1.40) |
| **Q5** | 0.60 (0.40-0.90) |
| **hepcidin*** | 0.88 (0.73-1.07) |
| **hemoglobin** | 1.01 (0.92-1.10) |
| **Age** | 1.00 (0.98-1.01) |
| **sex, female vs. male** | 0.94 (0.72-1.22) |
| **Race, African American vs. White** | 1.83 (1.40-2.41) |
| **BMI_P1** | 1.11 (1.09-1.13) |
| **Pack years of smoking*** | 1.22 (0.97-1.53) |
| **CRP*** | 1.17 (1.00-1.38) |
| **IL6*** | 1.22 (0.99-1.50) |

***Natural log transformed before analysis**

**Appendix Table 3. Race and Sex specific Analyses of** **Iron Somascan Biomarkers and Risk of Diabetes at Phase 2**

|  | **African Americans** | | **Non-Hispanic White Americans** | |
| --- | --- | --- | --- | --- |
|  | **Men** | **Women** | **Men** | **Women** |
|  | **OR (95% CI)** | **OR (95% CI)** | **OR (95% CI)** | **OR (95% CI)** |
| **Ferritin** | 1.49 (0.91-2.43) | 1.41 (0.92-2.16) | 0.98 (0.64-1.49) | 1.59 (0.99-2.56) |
| **Hepcidin** | 0.65 (0.41-1.03) | 0.86 (0.57-1.30) | 0.93 (0.65-1.34) | 0.76 (0.51-1.13) |
| **Transferrin** | 0.24 (0.02-3.00) | 0.30 (0.03-2.57) | 0.07 (0.01-0.63) | 0.19 (0.02-1.62) |
| **Hemoglobin at phase 2** | 1.28 (1.05-1.56) | 0.94 (0.79-1.13) | 0.89 (0.77-1.04) | 0.91 (0.76-1.10) |

Controlled for age, sex, baseline BMI, and baseline smoking pack years. Overall analyses additionally controlled for race. Ferritin, hepcidin and transferrin natural logarithmically transformed before analyses

**Appendix Table 4. Race and Sex specific Analyses of Inflammation Adjusted Iron Somascan Biomarkers and Risk of Diabetes at Phase 2**

|  | **African Americans** | | **Non-Hispanic White Americans** | |
| --- | --- | --- | --- | --- |
|  | **Men** | **Women** | **Men** | **Women** |
|  | **OR (95% CI)** | **OR (95% CI)** | **OR (95% CI)** | **OR (95% CI)** |
| **Ferritin** | 1.67 (1.00-2.78)* | 1.54 (0.99-2.38) | 1.01 (0.66-1.54) | 1.62 (1.01-2.60) |
| **Hepcidin** | 0.59 (0.36-0.96) | 0.76 (0.50-1.16) | 0.93 (0.65-1.35) | 0.74 (0.50-1.10) |
| **Transferrin** | 0.35 (0.03-4.70) | 0.53 (0.06-5.08) | 0.07 (0.01-0.60) | 0.31 (0.04-2.70) |
| **Hemoglobin at phase 2** | 1.30 (1.06-1.60) | 0.98 (0.94-1.01) | 0.89 (0.76-1.04) | 0.93 (0.77-1.12) |
| **CRP** | 1.31 (0.94-1.83) | 1.59 (1.09-2.31) | 0.78 (0.59-1.04) | 1.32 (0.93-1.88) |
| **IL-6** | 1.17 (0.69-1.96) | 0.93 (0.61-1.42) | 1.64 (1.11-2.43) | 1.31 (0.90-1.91) |

Controlled for age, sex, baseline BMI, and baseline smoking pack years. Overall analyses additionally controlled for race. Ferritin, hepcidin, transferrin, CRP and IL-6 were natural logarithmically transformed before analyses.

P=0.06 for ferritin in African American women. CRP and IL-6 were negative confounders of the relationship between ferritin and diabetes and positive confounders of the relationship between transferrin and diabetes in African American men and Non-Hispanic White American women.

*<0.05

**Appendix Table 5. Iron Somascan Biomarkers and Odds of Incident Diabetes at Phase 2, further controlled for menopausal status and selected medications.**

|  | **Overall** | | |
| --- | --- | --- | --- |
|  | **Model 1** | **Model 2** | **Model 3** |
|  | OR (95% CI) | OR (95% CI) | OR (95% CI) |
| **Ferritin** | 1.36 (1.08-1.70) | 1.49 (1.08-2.07) | 1.61 (1.14-2.25) |
| **Hepcidin** | 0.80 (0.65-0.97) | 0.83 (0.62-1.13) | 0.86 (0.63-1.18) |
| **Transferrin** | 0.25 (0.08-0.77) | 0.51 (0.11-2.43) | 0.79 (0.15-4.17) |
| **Hemoglobin** | 0.99 (0.91-1.08) | 0.94 (0.83-1.08) | 0.98 (0.85-1.13) |
| **CRP** | 1.18 (1.00-1.38) | 1.46-1.12-1.89) | 1.51 (1.14-2.01) |
| **IL-6** | 1.21 (0.98-1.49) | 1.15 (0.86-0.54) | 1.12 (0.82-1.52) |

Model 1 additionally controlled for age, sex, baseline BMI, and baseline natural log-transformed smoking pack years.

Model 2 additionally controlled all in model 2 plus menopausal status.

Model 3 additionally controlled for all in model 2 plus the following medications: statins, antiplatelets, diuretics, ACE/ARBS, and proton pump inhibitors.

**Appendix Table 6. Iron Somascan Biomarkers and Odds of Incident Diabetes at Phase 2, stratified by race and further controlled for menopausal status and selected medications.**

|  | **African Americans** | | | **Non-Hispanic White Americans** | | |
| --- | --- | --- | --- | --- | --- | --- |
|  | **Model 1** | **Model 2** | **Model 3** | **Model 1** | **Model 2** | **Model 3** |
|  | OR (95% CI) | OR (95% CI) | OR (95% CI) | OR (95% CI) | OR (95% CI) | OR (95% CI) |
| **Ferritin** | 1.56 (1.13-2.16) | 1.58 (1.02-2.45) | 1.65 (1.04-2.62) | 1.22 (0.89-1.68) | 1.42 (0.86-2.34) | 1.64 (0.98-2.74) |
| **Hepcidin** | 0.70 (0.51-0.95) | 0.74 (0.49-1.14) | 0.82 (0.53-1.29) | 0.86 (0.66-1.12) | 0.90 (0.59-1.39) | 0.84 (0.54-1.31) |
| **Transferrin** | 0.51 (0.10-2.73) | 0.50 (0.05-4.78) | 0.87 (0.08-1.17) | 0.15 (0.03-0.67) | 0.56 (0.06-5.28) | 0.69 (0.06-7.39) |
| **Hemoglobin** | 1.10 (0.96-1.25) | 0.92 (0.77-1.11) | 0.96 (0.79-1.17) | 0.91 (0.81-1.03) | 0.94 (0.77-1.14) | 0.97 (0.79-1.18) |
| **CRP** | 1.41 (1.11-1.81) | 1.63 (1.11-2.38) | 1.59 (1.05-2.39) | 0.99 (0.79-1.23) | 1.33 (0.92-1.92) | 1.56 (1.04-2.32) |
| **IL-6** | 1.03 (0.74-1.42) | 0.93 (0.61-1.43) | 0.93 (0.59-1.47) | 1.40 (1.07-1.83) | 1.40 (0.96-2.06) | 1.34 (0.89-2.01) |

Model 1 additionally controlled for age, sex, baseline BMI, and baseline natural log-transformed smoking pack years.

Model 2 additionally controlled all in model 2 plus menopausal status.

Model 3 additionally controlled for all in model 2 plus the following medications: statins, antiplatelets, diuretics, ACE/ARBS, and proton pump inhibitors.
